# Supplementary material for: Assessing atoll island future habitability in the context of climate change using Bayesian networks
Source: Copernicus journal article supplement (doi:10.5194/egusphere-2024-3884), 2025-03-12
Supplement: Supplementary file [file egusphere-2024-3884-RC1-supplement.pdf]

**egusphere-2024-3884 | Journal relation: NHESS** Submitted on 10 Dec 2024  
**Assessing atoll island future habitability in the context of climate change using Bayesian networks**  
Mirna Badillo-Interiano, Jérémy Rohmer, Gonéri Le Cozannet, and Virginie Duvat

DCISION: ACCEPT AS IT IS.
